# Supplementary material
Source: Frontiers journal article supplement (https://www.frontiersin.org/articles/433638)
Supplement: Table_3.XLSX [file Table_3.XLSX]

## Sheet: Sporolithales
Fossil coralline algal species of the order Sporolithales cited in the Mediterranean
Agardhiellopsis cretacea Me.Lemoine
Hemiphyllum atacicum Me.Lemoine
Kymalithon belgicum (Foslie) Me.Lemoine & J.Emb.
Paraphylllum amphiroaeforme (Rothpletz) Me.Lemoine
Paraphyllum primaevum Me.Lemoine
Sporolithon affine M.Howe
Sporolithon afonense (Maslov) D.Bassi, J.C.Braga, Zakrevskaya & Petrovna-Radionova
Sporolithon airoldii (Fravega) Vannucci, Quaranta & D.Basso
Sporolithon alternatum Poignant
Sporolithon anastomosans Pfender
Sporolithon antenorense Pfender
Sporolithon aschersonii (Schwager) Moussavian & Kuss
Sporolithon batalleri Me.Lemoine
Sporolithon batuense (Airoldi) Vannucci, Quaranta & D.Basso
Sporolithon bericum (Mastr.) Vannucci, Quaranta & D.Basso
Sporolithon boggiolense (Mastr.) Vannucci, Quaranta & D.Basso
Sporolithon brevium (Me.Lemoine) Jul.Aguirre & J.C.Braga
Sporolithon charneti Me.Lemoine
Sporolithon cenomanicum (Rothpletz)
Sporolithon cohaerens Segonzac
Sporolithon cretaceum (Mun.-Chalm.) Pfender
Sporolithon cyrenaicum Raineri
Sporolithon dallonii Me.Lemoine
Sporolithon dehornae Pfender
Sporolithon digitatum Pfender
Sporolithon dullfussi Me.Lemoine
Sporolithon ellipticum Me.Lemoine
Sporolithon eniwetokensis J.H.Johnson
Sporolithon fabianii (Mastr.) Vannucci, Quaranta & D.Basso
Sporolithon ferganense (Maslov) D.Bassi, J.C.Braga, Zakrevskaya & Petrovna-Radionova
Sporolithon feuillei Me.Lemoine
Sporolithon fijiense J.H.Johnoson & B.J.Ferris
Sporolithon glangeaudii (Me.Lemoine) Jul.Aguirre & J.C.Braga
Sporolithon gosaviense (Rothpletz) Pfender
Sporolithon gunteri J.H.Johnoson & B.J.Ferris
Sporolithon haugi Pfender
Sporolithon hemchandri (Spirada Rao) A.K.Ghosh & Maithy
Sporolithon hippuritorum (Mun.-Chalm.) Pfender
Sporolithon intermedium Raineri
Sporolithon irinae (Maslov) D.Bassi, J.C.Braga, Zakrevskaya & Petrovna-Radionova
Sporolithon johnsoni (Mastr.) Vannucci, Quaranta & D.Basso
Sporolithon keenanii M.Howe
Sporolithon kuboiensis (Ishij.) Iryu, D.Bassi & Woelk.
Sporolithon lackiense (C.P.Varma) A.K.Ghosh & Maithy
Sporolithon latifoliaceum Pfender
Sporolithon lauensum J.H.Johnson & B.J.Ferris (also as Sporolithon lauense)
Sporolithon leithakalkii (S.F.Conti) Vannucci, Quaranta & D.Basso
Sporolithon liberum (Me.Lemoine) Jul.Aguirre & J.C.Braga
Sporolithon lugenoi (Pfender) A.K.Ghosh & Maithy
Sporolithon lvovicum (Maslov) D.Bassi, J.C.Braga, Zakrevskaya & Petrovna-Radionova [= Sporolithon keenanii var. luvovicum Maslov]
Sporolithon lycoperdioides (Michelin) Me.Lemoine
Sporolithon mansoniense Segonzac
Sporolithon megamiensis Ishij.
Sporolithon megasporum J.H.Johnson
Sporolithon molle (Heydrich) Heydrich
Sporolithon myriosporum J.H.Johnson
Sporolithon nongsteinensis (Spirada Rao) A.K.Ghosh & Maithy
Sporolithon nummuliticum (Rothpletz) A.K.Ghosh & Maithy
Sporolithon oulianovi Pfender
Sporolithon parisiense (C.Gümbel) Me.Lemoine
Sporolithon penicillum Pfender
Sporolithon perplexum J.H.Johnson
Sporolithon phylloideum (Bucur & Dragastan) Tomás, Jul.Aguirre, J.C.Braga & Martín-Closas
Sporolithon poleoense (Mastr.) Vannucci, Quaranta & D.Basso
Sporolithon praerithraeum (Airoldi) Vannucci, Piazza, Fravega & D.Basso
Sporolithon provinciale Pfender
Sporolithon pseudokeenanii Mastr.
Sporolithon ptychoides Heydrich
Sporolithon puntiense (Airoldi) Vannucci, Quaranta & D.Basso
Sporolithon rude (Me.Lemoine) A.K.Ghosh & Maithy
Sporolithon rude var. flexuosum Poignant
Sporolithon saipanense (J.H.Johnson) A.K. Ghosh & Maithy
Sporolithon segonzacae Me.Lemoine
Sporolithon sociabile Me.Lemoine
Sporolithon statiellense (Airoldi) Vannucci, Piazza, Fravega & D.Basso
Sporolithon stefaninii Raineri
Sporolithon taiwanensis (Ishij.) Iryu, D.Bassi & Woelk.
Sporolithon turonicum (Rothpletz) Pfender
Sporolithon varium (Mastr.) Vannucci, Quaranta & D.Basso
Sporolithon zonatum (C.P.Varma) A.K.Ghosh & Maithy

## Sheet: Hapalidiales
Fossil coralline algal species of the order Hapalidiales cited in the Mediterranean
Lithothamnion abrardii Me.Lemoine
Lithothamnion aesitante S.F.Conti
Lithothamnion aggregatum Me.Lemoine
Lithothamnion airoldii S.F.Conti
Lithothamnion andrusovi Me.Lemoine
Lithothamnion applanatum Me.Lemoine
Lithothamnion aucklandicum (Foslie) Foslie
Lithothamnion betieri Me.Lemoine
Lithothamnion bofilli Me.Lemoine
Lithothamnion bornetii Foslie
Lithothamnion bourcartii Me.Lemoine
Lithothamnion bullei Me.Lemoine
Lithothamnion camarasae Pfender
Lithothamnion caramaniense Mastr.
Lithothamnion cardinellense Fravega, Piazza & Vannucci
Lithothamnion cavernosum Capeder
Lithothamnion charollaisi Segonzac
Lithothamnion corallinaeforme Me.Lemoine
Lithothamnion corallioides (P.Crouan & H.Crouan) P.Crouan & H.Crouan
Lithothamnion crispithallus J.H.Johnson
Lithothamnion cuvilleri Poignant & Chaffaut
Lithothamnion cymbicrusta J.H.Johnson
Lithothamnion disarmonicum S.F.Conti
Lithothamnion elongatum S.F.Conti
Lithothamnion exuberans Mastr.
Lithothamnion faurai Me.Lemoine
Lithothamnion ficheuri Me.Lemoine
Lithothamnion flexum Mastr.
Lithothamnion florea-brassica (Millet) Me.Lemoine
Lithothamnion fluxum (Mastr.)
Lithothamnion fruticulosum (Kützing) Foslie
Lithothamnion gaschei J.H.Johnson
Lithothamnion gaviense Fravega, Giammarino & Vannucci
Lithothamnion giammarinoi Fravega, Piazza & Vannucci
Lithothamnion glomeratum Capeder
Lithothamnion iharai Ishij.
Lithothamnion ilicense Segonzac
Lithothamnion ishigakiensis J.H.Johnson
Lithothamnion kühni Me.Lemoine
Lithothamnion lacroixi Me.Lemoine
Lithothamnion ladronicum J.H.Johnson
Lithothamnion leptum J.H.Johnoson & B.J.Ferris
Lithothamnion luxurum J.H.Johnson & W.A.Stewart
Lithothamnion macedonense Me.Lemoine
Lithothamnion macrosporangicum Mastr.
Lithothamnion magnum Capeder
Lithothamnion mamillosum Hauck
Lithothamnion manni J.H.Johnson & W.A.Stewart
Lithothamnion marianae J.H.Johnson
Lithothamnion mastrorillii Ishij.
Lithothamnion microcellulosum Maslov
Lithothamnion microcellulosum var. junior Maslov
Lithothamnion microphyllum Maslov
Lithothamnion microsporangicum Krivánné-Hutter
Lithothamnion minae Me.Lemoine
Lithothamnion minervae D.Basso
Lithothamnion minimum Segonzac
Lithothamnion miocenicum Sams.-Aruffo
Lithothamnion montainvillense Me.Lemoine
Lithothamnion moretii Me.Lemoine
Lithothamnion nanosporum J.H.Johnoson & B.J.Ferris
Lithothamnion nitidum Foslie
Lithothamnion obstrusum Airoldi
Lithothamnion operculatum Conti = Phymatolithon calcareum (Conti) D.Basso, Fravega & Vannucci
Lithothamnion oranense Me.Lemoine
Lithothamnion orbiculatum Krivánné-Hutter
Lithothamnion ovatum Capeder
Lithothamnion parvulum S.F.Conti
Lithothamnion peleense Me.Lemoine
Lithothamnion pentagonum S.F.Conti
Lithothamnion perplexum J.H.Johnson
Lithothamnion philippii Foslie
Lithothamnion pianfolchi Mastr.
Lithothamnion polymorphum Capeder
Lithothamnion ponzonense S.F.Conti
Lithothamnion praefruticulosum Maslov
Lithothamnion prascoi Mastr.
Lithothamnion radovisense Me.Lemoine
Lithothamnion ramosissimum (A.E.Reuss) Piller / Lithothmanion ramosissimum (C.Gümbel non A.E.Reuss) S.F.Conti = Lithothamnion valens Foslie (revised by Basso et al., 1994)
Lithothamnion rechae Segonzac
Lithothamnion rotundum Capeder
Lithothamnion roveretoi Airoldi
Lithothamnion saipanense J.H.Johnson
Lithothamnion saxorum Capeder
Lithothamnion saxorum var. korolukae Maslov
Lithothamnion serratezonatum Mastr.
Lithothamnion simii Mastr.
Lithothamnion sonderi Hauck
Lithothamnion subtile S.F.Conti
Lithothamnion suganum Rothpletz
Lithothamnion tchernomoricum Maslov
Lithothamnion tectifons Mastr.
Lithothamnion tenuatum Krivánné-Hutter
Lithothamnion tenue Capeder
Lithothamnion tenuiseptum Capeder
Lithothamnion toltraense Maslov
Lithothamnion torulosum C.Gümbel
Lithothamnion trinidadensum J.H.Johnson
Lithothamnion undulatum Capeder [Vannucci et al. 1997 included the species in Mesophyllum]
Lithothamnion valens Foslie
Lithothamnion variabile S.F.Conti
Lithothamnion vaughani M.Howe
Lithothamnion vialli Mastr.
Lithothamnion villaegranis Poignant
Lithothamnion voigti Pognant
Lithothamnion wallisium J.H.Johnson & Tafur
Melobesia badji Maslov (probably Lithoporella)
Mesophyllum alternans (Foslie) Cabioch & M.L.Mendoza
Mesophyllum austriacum Me.Lemoine
Mesophyllum biplanum Mastr.
Mesophyllum bonifacense Mastr.
Mesophyllum commune Me.Lemoine
Mesophyllum concretum (M.Howe) Me.Lemoine
Mesophyllum crassiusculum (Foslie) Lebednick
Mesophyllum curtum Me.Lemoine
Mesophyllum cf. erubescens (Foslie) Me.Lemoine = Melyvonnea erubescens (Foslie) Athanasiadis & D.L.Ballantine
Mesophyllum flexile Mastr. = Neogoniolithon contii (Mastr.) Quaranta, Vannucci & D.Basso
Mesophyllum fructiferum Airoldi
Mesophyllum galettoi Mastr.
Mesophyllum gignouxii Me.Lemoine
Mesophyllum horthocarpum Mastr.
Mesophyllum ingestum S.F.Conti
Mesophyllum iraqense J.H.Johnson
Mesophyllum ishijimae Mastr.
Mesophyllum koritzae (Me.Lemoine) Me.Lemoine
Mesophyllum laffitei Me.Lemoine
Mesophyllum lemoineae Souaya
Mesophyllum lichenoides (J.Eliis) Me.Lemoine
Mesophyllum ligusticum (Airoldi) Me.Lemoine
Mesophyllum macroblastum (Foslie) W.H.Adey
Mesophyllum marosticae Mastr.
Mesophyllum maslovii Mastr.
Mesophyllum mazzapiedense Mastr.
Mesophyllum obsitum Airoldi = Lithophyllum desitum Airoldi (Vannucci et al., 2008)
Mesophyllum pfenderae Me.Lemoine
Mesophyllum pliocenum Segonzac
Mesophyllum cf. printzianum Woelkerling & A.S.Harvey
Mesophyllum rigidum Mastr. = Neogoniolithon contii (Mastr.) Quaranta, Vannucci & D.Basso
Mesophyllum roveretoi S.F.Conti
Mesophyllum suganum (Rothpletz) Airoldi
Mesophyllum sancti-dionysii Me.Lemoine
Mesophyllum savornini Me.Lemoine
Mesophyllum schenckii M.Howe
Mesophyllum schenckii var. corticesum Maslov
Mesophyllum travesii Mastr.
Mesophyllum vallassae Mastr.
Mesophyllum vaughanii (M.Howe) Me.Lemoine
Mesophyllum vignyense (Me.Lemoine) Me.Lemoine
Mesophyllum yabei Ishij.
Mesophyllum yuyashimaensis Ishij.
Phymatolithon calcareum (Pallas) W.H.Adey & D.L.McKibbin ex Woelkerling & L.M.Irvine
Phymatolithon laevigatum (Foslie) Foslie
Phymatolithon lenormandii (Areschoug) W.H.Adey
Phymatolithon tenue (Rosenvinge) Düwel & Wegeberg
Pomatophyllum operculatum Conti = Phymatolithon calcareum (Basso et al. 1997)
Palaeothamnium archaeotypum Conti = Lithothamnion ramosissimum (Aguirre et al., 1996)
Palaeothamnium iorii Maslov --> Lithothamnion (*)
Palaeothamnium kossovense Maslov --> Lithothamnion (*)
Palaeothamnium oligocaenicum Me.Lemoine --> Lithothamnion (*)
Palaeothamnium ravanascoi Mastr. --> Lithothamnion (*)
(*) The genus Palaeothamnium is a younger synonym of Lithothamnion and the type species (P. archaeotypum) was transferred to Lithothamnion (Aguirre et al., 1996)

## Sheet: Corallinales
Fossil coralline algal species of the order Corallinales cited in the Mediterranean
Lithophyllum ? shebae G.F.Elliott
Amphiroa rigida J.V.Lamouroux
Arthrocardia mangini (Me.Lemoine)
Arthrocardia mengaudii (Me.Lemoine) Jul.Aguirre, J.C.Braga & D.Bassi
Corallina abundans Me.Lemoine
Corallina cossmannii Me.Lemoine
Corallina iberica Segonzac
Corallina matansa J.H.Johnson
Corallina prisca J.H.Johnson
Dermatolithon nitidum = Lithoporella nitida J.H.Johnson-
Distichoplax biserialis (Dietrich) Pia
Hydrolithon corculumis (Maslov) J.C.Braga, D.Bassi, Zakrevskaya & Petrovna-Radionova
Hydrolithon lemoinei (Miranda) Jul.Aguirre, J.C.Braga & D.Bassi
Jania alasaniensis Maslov
Jania dercourti J.H.Johnson
Jania dniestrovica Maslov
Jania guamensis J.H.Johnson
Jania lemoini Ishij.
Jania nummulitica Me.Lemoine
Jania toltrica Maslov
Jania ucrainica Maslov
Jania vetus J.H.Johnson
Jania wassoevicii Maslov
Karpathia sphaerocellulosa Maslov
Leptolithophophyllum intermedium Mastr. (**)
Leptolithophophyllum bonii Fravega, Giammarino & Vannucci (**)
Lithophylllum glangeaudi Me.Lemoine = Sporolithon glangeaudii (Me.Lemoine) Jul.Aguirre & J.C.Braga
Lithophyllum (Dermatolithon) cremae Raineri
Lithophyllum (Dermatolithon) lithoporellaeforme S.F.Conti
Lithophyllum (Dermatolithon) nataliae Maslov = Karpathia nataliae (Maslov) D.Bassi, J.C.Braga, Zakrevskaya & Petrovna-Radionova
Lithophyllum (Dermatolithon) papillosum Foslie
Lithophyllum acrocamptun Heydr.
Lithophyllum aequinnixum S.F.Conti (*)
Lithophyllum anguineum S.F.Conti (*)
Lithophyllum antiquum Me.Lemoine
Lithophyllum atrum S.F.Conti (*)
Lithophyllum bahrijense Airoldi (*)
Lithophyllum bassanense Mastr. (**)
Lithophyllum bellinii Mastr. (*)
Lithophyllum bonyense J.H.Johnson (**)
Lithophyllum byssoides (Lamark) Foslie
Lithophyllum capederi (Mastr. non Me.Lemoine) = Neogoniolithon contii (Mastr.) Quaranta, Vannucci & D.Basso
Lithophyllum cf. anguineum S.F.Conti
Lithophyllum compressum Mastr. (*)
Lithophyllum dentatum (Kützing) Foslie
Lithophyllum duplex Maslov
Lithophyllum embergeri Mastr. = Neogoniolithon contii (Mastr.) Quaranta, Vannucci & D.Basso
Lithophyllum exiguum S.F.Conti
Lithophyllum expansum Philippi
Lithophyllum giammarini Mastr. = Neogoniolithon contii (Mastr.) Quaranta, Vannucci & D.Basso
Lithophyllum grandiusculum (Montagne) Woelkerling, Penrose & Y.M.Chamb.
Lithophyllum heteromorphum Mastr. (*)
Lithophyllum incrustans Philippi
Lithophyllum intumescens Mastr. (**)
Lithophyllum ippolitoi S.F.Conti (*)
Lithophyllum kamptneri Mastr. (*)
Lithophyllum lateporatum Mastr. (*)
Lithophyllum lemoinei Raineri (*)
Lithophyllum lithothamnioides Maslov (*)
Lithophyllum maemongense J.H.Johnson
Lithophyllum malarodai Mastr. (*)
Lithophyllum martinicense Me.Lemoine (*)
Lithophyllum mgarrense Bosence
Lithophyllum microcarpum Maslov
Lithophyllum nitorum W.H.Adey & P.J.Adey
Lithophyllum orbiculatum (Foslie) Foslie
Lithophyllum ovatum (Capeder) Me.Lemoin (**)
Lithophyllum pactum Ishij. (*)
Lithophyllum papillosum (Zanardini ex Hauck) Foslie -Titanoderma-
Lithophyllum perrandoi Airoldi (*)
Lithophyllum personatum Airoldi = ?Spongites personatum (Airoldi) Vannucci, Quaranta & D.Basso
Lithophyllum premoluccense var. cretacica Maslov
Lithophyllum pustulatum (J.V.Lamouroux) Foslie
Lithophyllum racemus (Lamarck) Foslie
Lithophyllum sarmaticum Kamptner (*)
Lithophyllum sassellense Fravega & Vannucci (*)
Lithophyllum stictaeforme (Areschoug) Hauck
Lithophyllum tedeschii Fravega, Piazza & Vannucci (**)
Lithophyllum umbilicatum Mastr. (**)
Lithophyllum vicetinum Mastr. (*)
Lithophyllum viennotii Me.Lemoine = Lithophyllum incrustans (Braga & Aguirre, 1995)
Lithophyllum vignyense Me.Lemoine = Mesophyllum vignyense (Me.Lemoine) Me.Lemoine
Lithophyllum wynnei C.P.Varma (*)
Lithophylum ligusticum Airoldi = Lithophyllum perrandoi Airoldi (Vannucci et al., 2008) (*)
Lithoporella adumbrata Bielokrys
Lithoporella melobesioides (Foslie) Foslie
Lithoporella minus J.H.Johnson
Lithoporella quadratica Ishij.
Melobesia badji Maslov (probably Lithoporella)
Melobesia clivosa Bielokrys (probably Lithoporella)
Melobesia tarhankutica Maslov (probably Lithoporella)
Melobesia veneta Mastr. (probably Lithoporella)
Neogoniolithon brassica-florida (Harvey) Setchell & L.R.Mason
Neogoniolithon contii (Mastr.) Quaranta, Vannucci & D.Basso
Neogoniolithon lucentumense Segonzac
Neogoniolithon notarisii (Dufour) Hamel & Me.Lemoine
Neogoniolithon raripunctatum Mastr.
Neogoniolithon sanctae-polae Segonzac (*)
Palaeophyllum caucasicum Maslov [Corallinoideae? revised by Bassi et al. (2005)]
Palaeophyllum elegans Maslov [Corallinoideae? revised by Bassi et al. (2005)]
Palaeophyllum tesalii Maslov [Corallinoideae? lost type; revised by Bassi et al. (2005)]
Paulsilvella sp. (genus by Woelkerling, Sartorini & Boddi)
Peyssonnelia antiqua J.H.Johnson = Karpathia sphaerocelllulosa (Maslov) D.Bassi, J.C.Braga, Zakrevskaya & Ptrovna-Radionova
Peyssonnelia bistrata Moussavian = Karpathia bistrata (Moussavian) D.Bassi, J.C.Braga, Zakrevskaya & Ptrovna-Radionova
Peyssonnelia praeantiqua Moussavian = Karpathia praeantiqua (Moussavian) D.Bassi, J.C.Braga, Zakrevskaya & Ptrovna-Radionova
Peyssonnelia rara Moussavian = Karpathia rara (Moussavian) D.Bassi, J.C.Braga, Zakrevskaya & Ptrovna-Radionova
Peyssonnelia reposita Moussavian = Karpathia reposita (Moussavian) D.Bassi, J.C.Braga, Zakrevskaya & Ptrovna-Radionova
Peyssonnelia taeniforme Moussavian = Karpathia taeniforme (Moussavian) D.Bassi, J.C.Braga, Zakrevskaya & Ptrovna-Radionova
Pseudolph. expansum (Philippi) Me.Lemoine = Lithophyllum dentatum (Kützing) Foslie
Spongites albanensis (Lemoine) J.C.Braga,Bosence & Steneck = Spongites furticulosus Kützing (Braga et al., 2009; Aguirre et al., 2012)
Spongites decipiens (Foslie) Y.M.Chamberlain
Spongites fruticulosus Kützing
Spongites personatus (Airoldi) Vannucci, Quaranta & D.Basso
Spongites sulawesensis Verheij
Subterraniphyllum thomasii Elliott
Titanoderma (Dermatolithon) ucrainicum Maslov
Titanoderma cystoseriae (Hauck) Woelkerling, Y.M.Chamberlain & P.C.Silva
Titanoderma pustulatum (J.V.Lamouroux) Nägeli
Titanoderma pustulatum var. confine (P.Crouan & H.Crouan) Y.M.Chamberlain = Titanoderma pustutulatum (J.V.Lamouroux) Nägeli
Titanoderma pustulatum var. macrocarpum (Rosanoff) Foslie = Titanoderma pustutulatum (J.V.Lamouroux) Nägeli
(*) These species show features of the genus Spongites: cell fusions, non-coaxial ventral core, and uniporate sporangial conceptacles.
(**) These species show features of the genus Neogoniolithon: cell fusions, predominantely coaxial ventral core, and uniporate sporangial conceptacles.
