# Supplementary material
Source: Frontiers journal article supplement (https://www.frontiersin.org/articles/433638)
Supplement: Table_7.DOCX [file Table_7.DOCX]

**FILE SM6. List of references documenting the records of fossil corallines in the Mediterranean area reported in the supplementary files SM2, SM3, SM4 and SM5.**

Aguirre, J., and Jiménez, A.P. (1997). Census assemblages in hard-bottom coastal communities: a case study from the Plio-Pleistocene Mediterranean. Palaios 12, 598-608.

Aguirre, J., Baceta, J.I., and Braga, J.C. (2007). Recovery of primary marine producers after the Cretaceous-Tertiary mass extinction: Paleocene calcareous red algae from the Iberian Peninsula. Palaeogeog., Palaeoclimatol., Palaeoecol. 249, 393-411.

Aguirre, J., Braga, J.C., Martín, J,M., and Betzler, C. (2012). Palaeoenvironmental and stratigraphic significance of Pliocene rhodolith beds and coralline algal bioconstructions from the Carboneras Basin (SE Spain). Geodiversitas 34, 115-136.

Aguirre, J., Belaústegui, Z., Domènech, R., Gibert, J.M. de, and Martinell, J. (2014). Snapshot of a lower Pliocene *Dendropoma* reef from Sant Onofre (Baix Ebre Basin, Tarragona, NE Spain). Palaeogeog., Palaeoclimatol., Palaeoecol. 395, 9-20.

Airoldi, M. (1932). Contributto allo studio delle corallinacee del Terziario italiano. I. Le corallinacee dell´Oligocene Ligure-Piemontese. Paleontogr. Ital., 33, 55-83.

Arias, C., Masse, J.P., and Vilas, L. (1995). Hauterivian shallow marine calcareous biogenic mounds: SE Spain. Palaeogeog., Palaeoclimatol., Palaeoecol. 119, 3–17.

Aroldi, C., and Bucur, I.I. (2002). Palaeogene microfacies in some calcareous blocks of the Roaia Formation (Wildflysch Nappe – Maramures). Stud. Univ. Babes-Bolyai, Geol., Ep. Issue 1, 13-30.

Barattolo, F., Bassi, D., and Romano, R. (2007). Upper Eocene larger foraminiferal–coralline algal facies from the Klokova Mountain (southern continental Greece). Facies 53, 361-375.

Bassi, D. (1995). Crustose coralline algal pavements from Late Eocene Colli Berici of northern Italy. Riv. It. Paleontol. Stratigr., 101: 81-92.

Bassi, D. (1995). *Sporolithon*, *Hydrolithon*, *Corallina* and *Halimeda* in the Calcare di Nago (Eocene, Trento, Northern Italy). Annali dell´Università di Ferrara, Scienze della Terra, 6: 9-25.

Bassi, D.(1998). Coralline algal facies and their palaeoenvironments in the Late Eocene of Northern Italy (Calcare di Nago). Facies 39, 179–202.

Bassi, D. (2005). Larger foraminiferal and coralline algal facies in an Upper Eocene storm influenced, shallow water carbonate platform (Colli Berici, north-eastern Italy). Palaeogeog., Palaeoclimatol., Palaeoecol. 226, 17–35.

Bassi, D., and Luciani, V. (1995). Breve guida all´escursione Il Calcare di Nago e le alghe rosse (Eocene superiore, Lago di Garda, TN). Short Course, Le alghe rosse e verdi nell´Analisis paleoambientale. 1-15.

Bassi, D., and Nebelsick, J.H. (2000). Calcareous algae from the Lower Oligocene Gornji Grad Limestones of Northern Slovenia. Riv. Ital. Paleont. Strat. 106, 99–122.

Bassi, D., Woelkerling, W.J., and Nebelsick, J.H. et al. (2000). Taxonomic and biostratigraphical re-assessments of *Subterraniphyllum* Elliott (Corallinales, Rhodophyta). Palaeontology 43, 405-425.

Basso D., Nalin R., and Massari F. (2007). Genesis and composition of the Pleistocene Coralligène de plateau of the Cutro Terrace (Calabria, southern Italy). Neu. Jb. Geol. Palaont. Abh. 244, 173-182.

Basso, D., Vrsaljko, D., and Grgasovic, T. (2008). The coralline flora of a Miocene maërl: the Croatian “Litavac”. Geol. Croatica 61, 333-340.

Bellini, A., and Mastrorilli, V.I. (1975) Les corallinacées des coupes basales du miocène de Bonifacio. Bull. Soc. Sci. Histor. Natur. Corse 615-616, 33-59.

Benisek, M.F., Betzler, C., Marcano, G., and Mutti, M. (2009). Coralline-algal assemblages of a Burdigalian platform slope: implications for carbonate platform reconstruction (northern Sardinia, western Mediterranean Sea). Facies 55, 375-386.

Bielokrys, L.S. (1981). Meotian red algae of the Crimea. Paleontol. J. 15, 90-99.

Bosence, D.W.J. (1983). Coralline algae from the Miocene of Malta. Palaeontology 26, 147-173.

Bosence, D.W.J., and Pedley (1982). Sedimentology and palaeontology of Miocene coralline algal biostrome from the Maltese Islands. Palaeogeog., Palaeoclimatol., Palaeoecol. 38, 9-43.

Boulanger, D., and Poignant, A.F. (1975). Les nodules algaires du Miocéne d´Aquitaine méridionale. Bull. Cent. Etud. Rech. sci., Biarritz 10, 685-691.

Bover-Arnal, T., Ferràndez-Cañadel, C., Aguirre, J., Esteban, M., Fernández-Carmona, J., Albert-Villanueva, E., and Salas, R. (2017). Late Chattian platform carbonates with benthic foraminifera and coralline algae from the SE Iberian Plate. Palaios, 32, 61-82.

Bracchi, V. A., Basso, D., Savini, A. and Corselli, C. (2019). Algal reefs (Coralligenous) from glacial stages: origin and nature of a submerged tabular relief (Hyblean Plateau, Italy). Mar. Geol. 411, 119-132.

Braga, J.C., and Aguirre, J. (1995). Taxonomy of fossil coralline algal species: Neogene Lithophylloideae (Rhodophyta, Corallinaceae) from southern Spain. Rev. Palaeobot. Palynol. 86, 265-286.

Braga, J.C., and Bassi, D. (2011). Facies and coralline algae from Oligocene limestones in the Malaguide Complex (SE Spain). Ann. Naturhist. Mus. Wien, Serie A 113, 291-308.

Braga, J.C., and Martín, J.M. (1988). Neogene coralline-algal growth-forms and their palaeoenvironments in the Almanzora river valley (Almeria, S.E. Spain). Palaeogeog., Palaeoclimatol., Palaeoecol. 67, 285-303.

Braga, J.C., Jiménez, A.P., Martín, J.M., and Rivas, P. (1989). Coralline growths in coral-oyster, middle-Miocene reefs in souther Spain, in Algae in Reefs. Abstract Volume, eds. J.C. Braga, and J.M. Martín, Univ. de Granada, 21.

Braga, J.C., Martín, J.M., and Rivas, P. (1989). Upper-Tortonian coralline growths in the Almanzora corridor (Almeria, S.E. Spain), in Algae in Reefs. Field Trip, eds. J.C. Braga, and J.M. Martín, Univ. de Granada, 27-42.

Braga, J.C., Vescogni, A., Bosellini, F., and Aguirre, J. (2009). Coralline algae in Mediterranean Messinian reefs. Palaeogeog., Palaeoclimatol., Palaeoecol. 275, 113-128.

Brandano, M., Vannucci, G., Pomar, L., and Obrador, A. (2005). Rhodolith assemblages from the lower Tortonian carbonate ramps of Menorca (Spain): Environmental and paleoclimatic implications. Palaeogeog., Palaeoclimatol., Palaeoecol. 226, 307-323.

Brandano, M., Vannucci, G., and Mateu-Vicens, G. (2007). Le alghe rosse calcaree come indicatori paleoambientali: l’esempio della rampa carbonatica Laziale-Abruzzese (Burdigaliano, Appennino centrale). Boll. Soc. Geol. It. 126, 55-69.

Brandano, M., Frezza, V., Tomassetti, L., Pedley, M., and Matteucci, R. (2009). Facies analysis and palaeoenvironmental interpretation of the Late Oligocene Attard Member (Lower Coralline Limestone Formation), Malte. Sedimentology 56, 1138-1158.

Brandano, M., Tomassetti, L., Bosellini, F., and Mazzucchi, A. (2010). Depositional model and paleodepth reconstruction of a coral-rich, mixed siliciclastic-carbonate system: The Burdigalian of Capo Testa (northern Sardinia, Italy). Facies56, 433-444.

Buchbinder, B. (1977). Systematics and paleoenvironments of the calcareous algae from the Miocene (Tortonian) Ziqlag Formation, Israel. Micropaleontology, 23: 415-435.

Bucur, I.I. (1981). *Archaeolithothamnium rude* Lemoine in calcarele aptianuli superior de la Doman (Zona Resita-Moldova Noua, Banat). Studia Univ. Babes-Bolyai, Geol.-Geogr. 26, 33-36.

Bucur, I.I. (1994). Algues calcaires de la zone de Resita-Moldova Noua (Carpathes meridionales, Poumaine). Rev. Paléobiol. 13, 147-209.

Bucur, I.I., and Baltres, A. (2002). Cenomanian microfossils in the shallow water limestones from Babadag Basin: biostratigraphic significance. Stud. Univ. Babes-Bolyai, Geol., Ep. Issue 1, 79-95.

Bucur, I.I., and Dragastan, O. (1986). *Archaeolithothamnion phylloideum*, nouvelle espèce de corallinacée du Crétacé inférieur de l´ouest de la Rumanie. Rev. Micropaléontol. 28, 227-232.

Bucur, I.I., and Filipescu, S. (1994). Middle Miocene red algae from the Transylvanian Basin (Romania). Beiträge zur Paläontol. 19, 39-47.

Bucur, I.I., and Lanolin, C. (1987). L’Éocene de Ternu Rosu-Porcesti. Considérations sur les algues calcaires. The Eocene from the Transylvanian Basin, Cluj-Napoca, 37-42.

Bucur, I.I., and Nicorici, E. (1992). Calcareous algae from the Sarmatian deposits in the Simleu Basin (Romania). Stud. Univ. Babes-Bolyai, Geol. 37, 3-7.

Bucur, I.I., and Urian, R. (1989). Algues calcaires (Rhodophyceae) dans las dépôts du Crétacé supérieur de la bordure nord-est des Monts Gilau. Stud. Univ. Babes-Boyai, Geol.-Geog. 34, 33-38.

Bucur, I.I., Mészáros, N., Polikronopoulos, K., and Karagianis, H. (1984). Algues floridées dans les calcaires de l’Éocene supérieur de Letca et Rastoci (NW du bassin de Transylvaniae). Muzeul Brukenthal - Stud. Comunicari – St. nat. 26, 7-13.

Bucur, I.I., Onac, B.P., and Todoran, V. (1989). Algues calcaires dans les dépôts Oligocènes inférieurs de la région Purcâret-Mesteacân-Valea Chioarului (NW du Bassin de Transylvanie). The Oligocene from the Transylvanian Basin (Petrescu-Iustinian Editions, Univ. Cluj-Napoca, Cluj-Napoca), 141-148.

Capeder, G. (1900). Contribuzione allo studio dei *Lithothamnium* terziari. Malpighia, 51: 172-182.

Chatalov, A., Bonev, N., and Ivanova, D. (2015). Depositional characteristics and constraints on the mid-Valanginian demise of a carbonate platform in the intra-Tethyan domain, Circum-Rhodope Belt, northern Greece. Cret. Res. 55, 84-115.

Checconi, A., Bassi, D., Passeri, L., and Rettori, R. (2007). Coralline red algal assemblage from the Middle Pliocene shallow-water temperate carbonates of the Monte Cetona (Northern Apennines, Italy). Facies 53, 57–66.

Checconi, A., Bassi, D., Carannante, G., and Monaco, P. (2010). Re-deposited rhodoliths in the Middle Miocene hemipelagic deposits of Vitulano (southern Apennines, Italy): Coralline assemblages characterization and related trace fosils. Sed. Geol. 225, 50-66.

Chelaru, R., and Bucur, I.I. (2016). The taxonomy of middle Miocene red algae from the Gârbova de Sus Formation (Transylvanian Basin, Romania). Carnets Geol. 16, 307-336.

Coletti, G., Hrabovský, J., and Basso, D. (2016). *Lithothamnion crispatum*: long-lasting species of non-geniculate coralline algae (Rhodophyta, Hapalidiales). Carnets Geol. 16, 27-41.

Coletti, G., Basso, D. and Corselli, C. (2018). Coralline algae as depth indicators in the Sommières Basin (early Miocene, southern France). Geobios 51, 15-30.

Conrad, M.A., and Masse, J.P. (1989). es algues calcaires des formations carbonatées de l'Hauterivien-Barrémien pro partedu Jura vaudois et neuchâtelois (Suisse). Mém. Soc. neuchâteloise Sci nat. 11, 277–290.

Consigliere, C., Fravega, P., Piazza, M., Stockar, R., and Vannucci, G. (2004). Larger foraminifera and red calcareous alga from Gàssino Formation: the Cascina Spinosa Alta assemblages (Eocene Monferrato, NW Italy). Atti Ticinensi di Sci. Terra 45, 11-22.

Conti, S. (1942-43). Contributo allo studio delle corallinacee del Terziario italiano. II. Corallinacee de Miocene Ligure-Piemontese. Paleontogr. Ital. 41, 37-61.

Conti, S. (1946). Le Corallinacee del calcare miocenico (Leithakalk) del bacino di Vienna. Public. Istit. Geol. Univ. Genova, Ser. A-Paleontol. 1-2, 31-68.

Corselli, C., Basso, D., and Garzanti, E. (1994). Paleobiological and sedimentological evidence of Pleistocene/Holocene hiatuses and ironstone formation at the Pontian islands shelfbreak (Italy). Mar. Geol. 117, 317-328.

D'Atri, A., and Piazza, M. (1988). Facies a Corallinacee del Pliocene di Masserano (Biellese). Museo Regionale di Scienze Naturali. Torino. Atti IV Simp. Ecol. Paleoecol. Comunità Bentoniche. Sorrento, 387-395.

Deloffre, R., Poignant, A.F., and Teherani, K. (1977). Algues calcaires de l´Albo-Aptien au Paléocène de l´Iran Central. Bull. Centres Rech. Explor.-Elf Aquit. 1, 29-57.

Di Credico, N., Fravega, P., Giammarino, S., Piazza, M., and Vannucci, G. (2004). Algal assemblages of Cala Pisana Member, Lampedusa Formation (late Miocene, Lampedusa Island). Boll. Acc. Gioenia Sci. Nat. 37, 217-243.

Di Geronimo, R., (1998). Le Corallinales del Quaternario dell'Italia meridionale (sistematica, paleoecologia e paleobiogeografia). Ph.D. Thesis, Univ. Messina, Italy.

Di Geronimo, R. (2007). An account of Pleistocene species of *Lithophyllum* (Corallinaceae, Rhodophyta) from Sicily (Southern Italy). N. Jahr. Geol. Paläontol. Abhandlungen 244, 183-196.

Di Geronimo, I., Di Geronimo, R., Rosso, A., Girone, A., and La Perna, R. (2003). Authochtonous and allochthonous ssemblages from lower Pleistocene sediments (Palione, River,Sicily). Boll. Soc. Paleontol. It. 42, 133-138.

Dieni, J., Massari, F., and Poignant, A.F. (1979). Testimonianze di Paleocene marino in Sardegna. Riv. Ital. Paleontol. 85, 481-516.

Edgell, H.S., and Basson, P.W. (1975). Calcareous algae from the Miocene of Lebanon. Micropaleontology 21, 165-184

Elliott, G.F. (1959). New calcareous from the Cretaceous of Iraq. Rev. Micropaléontol. 1, 217-222.

Elliott, G.F. (1960). Fossil calcareous alga floras of the Middle East with a note on a Cretaceous problematicum *Hensonella cylindrica* gen. et sp. nov. Quart. Jour. Geol. Soc. London 115, 217-232.

Francavilla, F., Frascari Ritondale Spano, F., and Zecchi, R. (1970). Alghe e macroforaminiferi al limite Eocene-Oligocene presso Barbarano (Vicenza). Giorn. Geol. 36 (1968), 653-686.

Fravega, P. (2005). Le associazioni algali oligo-mioceniche dei “calcari a nullipore” di Contrada Guardiana, a sud di Pachino (Sicilia meridinale). Boll. Acc. Gioenia Sci. Nat. 38, 101-123.

Fravega, P., and Vannucci, G. (1980). Associazione a corallinacee nella serie di costa Merlassino (Alessandria) e suo significato ambientale. Ann. Univ. Ferrara 6, 93-117.

Fravega, P., and Vannucci, G. (1982). Significato e caratteristiche degli episodi a rhodolito al «top» del Serravalliano tipo. Geol. Romana 21, 705-715.

Fravega, P., and Vannucci, G. (1987). Significato delle facies algali delle sequenze tardo serravalliane-tortoniane ad Ovest di Gavi (Bacino Terziario del Piemonte). Boll. Acc. Gioenia Sci. Nat. 20, 317-334.

Fravega, P., Giammarino, G., and Vannucci, G. (1984). Episodi ad «algal balls» e loro significato al passagio arenarie di serravalle-marne di S. Agata fossili a nord di Gavi (Bacino Terziario del Piemonte). Atti soc. Toscana Sci. Nat., Ser. A 91, 1-20.

Fravega, P., Giammarino, G., and Vannucci, G. (1984). Algal remains and their correlation with microfaunas in the Benghazi limestone (Middle Miocene of western Cyrenaica). Boll. Soc. Geol. It. 103, 503-514

Fravega, P., Giammarino, G. Piazza, M., Russo, A., and Vannucci, G. (1987). Significato paleoecologico degli episodi coralgali a nord di Sassello. Nuovi dato per una ricostruzione paleogeografico-evolutiva del margine meridionale del Bacino Terziario del Piemonte. Atti soc. Toscana Sci. Nat., Ser. A 94, 19-76

Fravega, P., Piazza, M., and Vannucci, G. (1988). Le corallinacee della successione messiniana pre-evaporitica di Capo San Marco (Sardegna occidentale). Atti 4º Simp. Ecol. Paleoecol. com. bent. 323-340.

Fravega, P., Giammarino, G., Traverso, G., and Vannucci, G. (1988). Insediamenti coralgali e loro significato delle conoidi oligoceniche della Val Lemme (Bacino Terziario del Piemonte). Atti 4º Simp. Ecol. Paleoecol. com. bent. 199-221.

Fravega, P., Piazza, M., and Vannucci, G. (1993). Three new species of coralline algae (genera *Lithothamnion* and *Lithophyllum*) from the Tertiary Piedmont Basin. Riv. It. Paleontol. Strat. 98, 453-466.

Fravega, P., Piazza, M., and Vannucci, G. (1993). *Lithophyllum ippolitoi*, a new species of coralline algae from Tertiary Piedmont Basin. Riv. It. Paleontol. Strat. 99, 271-276.

Fravega, P., Piazza, M., and Vannucci, G. (1993). Importance and significance of the rhodolithic bodies in the miocenic sequences of Tertiary Piedmont Basin, in Studies on Fossil Benthic Algae, eds. F. Barattolo, P., De Castro, and M. Parente. Boll. Soc. Paleontol. It., Spec. Vol. 2 1, 197-210.

Fravega, P., Piazza, M., Stockar, R., and Vannucci, G. (1994). Oligocene coral and algal reef and related facies of Valzemola (Savona, NW Italy). Riv. It. Paleontol. Strat. 100, 423-456.

Fravega, P., Piazza, M., and Vannucci, G. (1994). Nongeniculate coralline algae associations from the Calcare di Rosignano Formation, lower Messinian, Tuscany (Italy), in Studies on Ecology and Palaeoecology of Benthic Communities, eds. R. Matteuci, M.G., Carboni, and J.S. Pignatti. Boll. Soc. Paleontol. It. Spec. Vol. 2, 127-140.

Fravega, P., Giammarino, G., Piazza, M., and Vannucci, G. (1998). The rhodolith pavement of the Punta Guitja section, Lampedusa Formation (upper Miocene – Island of Lampedusa, Pelagian Block). Preliminary note. Boll. Soc. Paleontol. It. 39, 413-416.

Giammarino, S., Nosengo, S., and Vannucci, G. (1970). Risultanze geologico - paleontologiche sul conglomerato di Portofino (Liguria orientale). Atti Istit. Geol. Univ. Genova 7, 305-363.

Gümbel, C.W. (1871). Die sogenannten Nulliporen (*Lithothamnium* und *Dactylopora*) und ihre Betheiligung an der Zusammensetzung der Kalkgesteine. Erster theil. Die Nulliporen des Pflanzenreichs (Lithothamnium). Abh. Bayer. Akad. Wiss. 11, 13-52.

Hrabovský, J. (2019). Reproductive phases of Miocen algae from central Paratethys and their bearing on systematics. Acta Paleontol. Polon. 64, 417-439.

Hrabovský, J., Basso, D., and Doláková, N. (2016). Diagnostic characters in fossil coralline algae (Corallinophycidae: Rhodophyta) from the Miocene of southern Moravia (Carpathian Foredeep, Czech Republic) J. Syst. Palaeontol. 14, 499-525.

Hrabovský, J., Basso, D., and Coletti, G. (2019). The first identification of fossil Mesophyllum in accordance to the modern taxonomic concepts in coralline algae. Acta Paleontol. Polon. 64. doi 10.4202/app.00591.2019.

Johnson, J.H. (1964). Miocene coralline algae from northern Iraq. Micropaleontology 10, 477-485.

Johnson, J.H. (1965). Coralline algae from the Cretaceous and early Tertiary of Greece. J. Paleontol. 39, 802-814.

Johnson, J.H., and Tafur, I.A. (1952). Coralline algae from the Eocene Atascadero limestone. J. Paleontol. 26, 537-543.

Juignet, P. (1969). Position stratigraphique et paléoécologique *d'Archaeolithothamnium lycoperdioide* (Michelin), algue mélobésiée dans la Cénomanien du Mans (Sarthe). Rev. Micropaléontol. 12, 85-91.

Kamptner, E. (1941). Corallinaceen aus sarmatischen Ablagerungen. Akad. Wiss. Wien, nat.-nat. Kl. Anz, Jg. 78, 70-73.

Kamptner, E. (1941). Zwei corallinacee aus dem Sarmat des Alpes-Ostrandes und der Hainburger Berger. Ann. Naturhist. Mus. Wien 52, 5-19.

Kershaw, S., Guo, L., and Braga, J.C. (2005). A Holocene coral-algal reef at Mavre Litharia, Gulf of Corinth, Greece: structure, hostory, and applications in relative sea-level change. Mar. Geol. 215, 171-192.

Khalifa, H., Soliman, H.A., and Kehelia, E. (1986). Fossil algae and biostratigraphy of the Middle Eocene rock succession at the southeast of Minia, Nile Valley, Upper Egypt. Arab. Gulf J. Scient. Res. 4, 141-157.

Krivannè-Hutter, E. (1962). Zátonyépító vörösalgák (Corallinaceák) az Eger környéki Oligocénból. [Reef building red algae (Corallinaceae) from the Oligocene of the region of Eger]. Bull. Hungarian Soc. Geol. 91, 432-441.

Kroeger, K.F. (2007). Upper Miocene coralline red algal associations of central Crete (Greece): taxonomy and palaeoenvironmental implications. N.Jb. Geol. Paläontol. Abh. 244, 143-171.

Kroeger, K.F., Reuter, M., and Brachert, T.C. (2006). Palaeoenvironmental reconstruction base don non-geniculate coralline red algal assemblages in Miocene limestone of central Crete. Facies 52, 381-409.

Kuss, J. (1994). Cretaceous (Albian-Turonian) calcareous algae from Egypt and Jordan - systematics, stratigraphy and paleogeography. Abandl. Geol. Bund. 50, 295-317.

Lemoine, M.P. (1919). Contribution a l'étude des Corallinacées fossiles. V. Les corallinacées du Pliocène et du Quaternaire de Calabre et de Sicile recueillies par M. Gignoux. Bull. Soc. géol. Fr., ser. 4 19, 101-114.

Lemoine, M.P. (1923). Contribution a l'étude des Corallinacées fossiles. VII. Mélobésiées Miocènes recueillies par M. Boucart en Albanie. Bull. Soc. géol. Fr., ser. 4 23, 275-283.

Lemoine, M.P. (1925). Mélobésiées de l'Aptien et de l'Albien. Bull. Soc. géol. Fr., ser. 4, 25, 3.

Lemoine, M.P. (1926). Révision des Mélobésiées tertiaries d'Italie décrites par M. Capeder. Comp. Rendus Congr. Soc. Savantes 241-259.

Lemoine, M.P. (1927). Sur quelques algues calcaires du Nummulitique de la Haute-Savoie. Bull. Mus. d'Hist. Nat. 33, 548-551.

Lemoine, M.P. (1928). Corallinacées fossiles de Catalogne et de Valence recueillies par M. l'abbé Bataller. Instit. Catalana Hist. Nat., 2ª Ser. 8, 92-107.

Lemoine, M.P. (1929). Contributiopns a l'étude des Corallinacées fossiles. X. Les Mélobésiées recueillies par M. Viennot dans le Miocène de la province de Grenade. Bull. Soc. géol. de France 29, 263-273.

Lemoine, M.P. (1939). Algues calcaires fossiles de l'Algérie. Matériaux pour la Carte Géologique de L'Algérie. 1re Série Paléontologie, 9, 1-128.

Lemoine, M.P. (1970). Les algues floridées calcaires du Crétacé du sud de la France. Arch. Mus. Nat. d’Hist. Nat., Paris, Série 7, 10, 129-240.

Lemoine, M.P. (1977). Étude d'une collection d'algues corallinacées de la région de Skopje (Yougoslavie). Rev. Micropaléont. 20, 10-42.

Lemoine, M.P., and Enberger, J. (1967). *Kymalithon*, nouveau genre de Mélobésiée de l’Aptien supérieur et considérations sur l’age du faciès a Mélobésiées dit “Facies de Vimport”. Actes Soc. Linn. Bourdeaux 104, 3–14.

Maslov, V.P. (1956). Fossil calcareous algae of USSR. Trudy Inst. Geol. Nauk Akad. Nauk SSSR 160, 1-301 (in Russian).

Maslov, V.P. (1962). Fossil red algae of the USSR and their relation to facies. Trudy Inst. Geol. Nauk Akad. Nauk SSSR 70, 75-78. [In Russian].

Massieux, M. (1961). Faciès à algues dans l´Yprésien du bassin d´Albas (Aude). C.R. Somm. Soc. Géol. Fr. 2, 40-41.

Mastrorilli, V.I. (1950). Corallinacee fossili del Calabriano di Miradolo. Atti Istit. Geol. Univ. Pavia 4, 57-67.

Mastrorilli, V.I. (1952). Corallinacee fossili del calcare miocenico di Barrea (Abruzzi). Publ. Istit. Geol. Univ. Genova 7, 3-8.

Mastrorilli, V.I. (1955). Sui noduli fossiliferi di M. Vallasa (Appenino Pavese). Atti Istit. Geol. Univ. Pavia 6, 61-74.

Mastrorilli, V.I. (1958). Contributo allo studio delle corallinacee fossili dei Monti Lessini. Corallinacee eoceniche dei Lessini Veronesi. Publ. Istit. Geol. Univ. Genova 12, 3-18.

Mastrorilli, V.I. (1967). *Lithophyllum contii*: nuova specie di corallinacee diffusa nella formazione oligocenica di Bric Mazzapiede, Presso Prasco (Acqui). Atti Istit. Geol. Univ. Genova 4, 475-488.

Mastrorilli, V.I. (1968). Nuovo contributo allo studio delle Corallinacee dell'Oligocene Ligure-Piemontese: I reperti della Tavoletta Ponzone. Atti Istit. Geol. Univ. Genova 5, 153-406.

Mastrorilli, V.I. (1973). Flore fossili a corallinacee di alcune località venete tra i Berici e l´Altopiano di Asagio. Atti. Soc. It. Sci. nat. Mus. civ. Stor. nat. Milano 114, 209-292.

Moussavian, E. (1984). Die Gosau- und Alttertiär-Gerölle der Angerberg-schichten (Höheres Oligozän, Unterinntal, nördliche Kalkalpen). Facies 10, 1-86.

Moussavian, E. (1988). Die Peyssonneliaceen (auct.: Squamariaceae; Rhodophyceae) der Kreide und des Paläogen der Ostalpen. Mitt. Bayer. Staatsslg. Paläont. hist. Geol. 28, 89-124.

Moussavian, E. (1993). Facies development of the eastern Alpine Paleogene with respect to algal associations, in Facial Development of Algae-Bearing Carbonate Sequences in the Eastern Alps. eds. R. Höfling, E. Moussavian, and W.E. Piller, Field Trip Guidebook, Munich. Excursion A4, 27 pp.

Moussavian, E. 1993. Eocene corallinacean-dominated localities of the Helvetic zone / Upper Bavaria, in Facial Development of Algae-Bearing Carbonate Sequences in the Eastern Alps. eds. R. Höfling, E. Moussavian, and W.E. Piller, Field Trip Guidebook, Munich. Excursion B1, 11 pp.

Moussavian, E., and Kuss, J. (1990). Typification and status of *Lithothamnium aschersoni* Schwager, 1883 (Corallinaceae, Rhodophyta) from Paleocene limestones of Egypt. A contribution to the synonymy and priority of the genera *Archaeolithothamnium* Rothpletz and *Sporolithon* Heydrich. Ber. geowiss. Abh. 120, 929-942.

Moussavian, E., Höfling, R., and Herm, D. (1993). Facies development of the eastern Alpine Cretaceous with respect to algal associations, in Facial Development of Algae-Bearing Carbonate Sequences in the Eastern Alps. eds. R. Höfling, E. Moussavian, and W.E. Piller, Field Trip Guidebook, Munich. Excursion A3, 27 pp.

Murru, M., Bassi, D., and Simone, L. (2015). Displaced/re-worked rhodolith deposits infilling parts of a complex Miocene multistorey submarine channel: A case history from the Sassari area (Sardinia, Italy). Sed. Geol. 326, 94-108.

Orszag-Sperber, F., and Poignant, A.F. (1972). Corallinacées du Miocène de la plaine orientale corse. Rev. Micropaléontol. 15, 115-124.

Orszag-Sperber, F. Poignant, A.F., and Poisson, A. (1977). Paleogeographic significance of rhodolites: Some examples from the Miocene of France and Turkey, in Fossil Algae. Recent Results and Developments, ed. E. Flügel. Springer Verlag, Berlin, 286-294.

Pfender, J. (1926). Sur les organismes du Nummulitique de la colline de San Salvador près Camarasa. Bol. Soc. esp. Hist. Nat., 26: 321-330.

Piller, W.E. (1993). Facies development and coralline algae in the Vienna and Eisenstadt Basins (Miocene), in Facial Development of Algae-Bearing Carbonate Sequences in the Eastern Alps. eds. R. Höfling, E. Moussavian, and W.E. Piller, Field Trip Guidebook, Munich. Excursion B7, 24 pp.

Pisera, A. (1985). Paleoecology and lithogenesis of the middle Miocene (Badenian) algal-vermetid reefs from the Roztocze Hills, south-eastern Poland. Acta Geolol. Polonica 35, 89-155.

Pisera, A., and Studencki, W. (1989). Middle Miocene rhodoliths from the Korytnica basin (Southern Poland): Environmental significance and paleontology: Acta Paleontol. Polon. 34, 179-209.

Poignant, A.F. (1968). Les algues des calcaires Aptiens et Albiens d'Aquitaine méridionale. Rev. Micropaléontol. 10, 271-276.

Poignant, A.F. (1969). Les algues du toit des bauxites des environs de Mazaugues (Var). Rev. Micropaléontol. 2, 233-240.

Poignant, A.F. (1973). A propos *d'Archaeolithothamnium cretaceum* (Rothpletz) Pfender. Cahiers Géol. 89, 2-5.

Poignant, A.F. 1974. Les algues du Crétacé supérieur Nord-Aquitain: problèmes stratigraphiques. Bull. Centre Rech. Sc. Biarritz 10, 361-366

Poignant, A.F. (1980). L´environnement des algues rouges. Exemples des formes du Crétacé moyen d´Aquitaine. C.R. 105e Coongrès Nat. Soc. Savantes, Caen 11, 313-322.

Poignant, A.F. (1981). Les algues calcaires au Crétacé Moyen. Cretac. Res. 2, 405-408.

Poignant, A.F., and Blanc, P.L. (1974). Les algues calcaires du Crétacé supérieur des Rides de Villagrains-Landiras et Roquefort-Creon (aquitaine centrale). Geobios 7, 71-75.

Poignant, A.F., and Chaffaut, S.A. (1970). Les algues des formations transgessives Maestrichtiennes, Paléocènes et Yprésiennes de la cote sud-orientale de la Corse. Rev. Micropaléontol. 12, 202-208.

Poignant, A.F., Cherchi, A., and Schroedler, R. (1981). Les Corallinacées crétacées du nord-oues de la Sardaigne. Rev. Micropaléontol. 24, 244-252.

Puga-Bernabéu, Á., Braga, J.C., and Martín, J.M. (2007). High-frequency cycles in upper Miocene, ramp temperate carbonates (Sorbas Basin, SE Spain). Sed. Geol. 53, 329-345.

Raineri, R. (1920). Alghe siforee fossili della Libia. Atti. Soc. ital. Sci. nat. 61, 72-86.

Raineri, R. (1923). Alghe fossili mioceniche di Cirenaica. Nouva Notarisia 35, 5-23.

Rasser, M. (1994). Facies and palaeoecology of rhodoliths and acervulinid macroids in the Eocene of the Krappfeld (Austria). Beitr. Paläontol. 19, 191-217.

Rasser, M., and Nebelsik, J.H. (2003). Provenance analysis of Oligocene autochthonous coralline algae: a quantitative approach towards reconstructing transported assemblages. Palaeogeog., Palaeoclimatol., Palaeoecol. 201, 89-111.

Rasser, M., and Piller, W.E. (1994). Re-documentation of Paleocene coralline algae of Austria, described by Lemoine (1930). Beitr. Paläontol. 19, 219-225.

Rasser, M., and Piller, W.E. (2000). Designation of Phymatolithon (Corallinaceae, Rhodophyta) in fossil material and its paleoclimatological indications. Micropaleontology 46, 89-95.

Rasser, M., and Piller, W.E. (2004). Crustose algal framework from the Eocene Alpine foreland. Palaeogeog., Palaeoclimatol., Palaeoecol. 206, 21-39.

Rothpletz, H. (1891). Fossile kalkagen aus den familien der Codiaceen und der Corallineen. Zeitschr. Deutsch. geol. Ges. 43, 295-322.

Samsonoff-Aruffo, C. (1917). Di alcune alghe calcaree provenienti dall´isola di Malta. Rendicorti Accad. Lincei 26, 564-616.

Savornin, M.J. (1902). Note préliminairre sur les *Lithothamnium* des terrains Tertiaires d´Algérie. Bull. Soc. géol. France 11, 158-162.

Schaleková, A. (1963). Die algenfloren der Kretazischen und Paläogenen kalksteine der Slowakei. Geol. Sborník 14, 165-167.

Schaleková, A. (1964). New information on the calcareous algae in the bioherm limestones of the Paleocene - Lower Eocene in Western and Central Slovakia. Geol. Sbornik 15, 57-73.

Schaleková, A. (1969). Zur nëheren kenntniss der corallinaceen im Leithakalk des sandberges bei Devínska Nová Ves (Theben-Neudorf) in der Südwestslowakei. Acta Geol. Geograph. Univ. Comenianae 18, 93-102

Schaleková, A. (1973). Oberbadenische corallinaceen aus dem Steimbruch Rohoznik-Vajar an dem westhang der Kleinen Karpaten. Acta Geol. Geograph. Univ. Comenianae 26, 211-221.

Schaleková, A., and Cierna, E. (1985). Algenflora des unteren Badeniens (Corallinaceae, Bacillariophyceae) aus der Umgebung von Kosihovee (Südslowakisches Becken, Westkarpaten). Acta Geol. Geograph. Univ. Comenianae 39, 35-49.

Segonzac, G. (1972). Nouvelle espèces de corallinacées (algues calcairers) du Néogène d´Espagne. Bull. Soc. Hist. Nat. Toulouse 108, 280-286.

Segonzac, G. (1979). Algues calcaires du Thanétien d´Esperaza (Aude). Soc. Hist. Nat. Toulouse, Bull. 115, 439-463.

Segonzac, G. (1990). Algues néogènes bétiques. In Montenat, C. (editor), Les Bassins Nogénès du Domaine Bétique Oriental (Espagne). Doc. Trav. Instit. Géol. Albert-de-Lapparent 12-13, 35-41.

Segonzac, G., and Charollais, J. (1974). Sur quelques algues calcaires (Corallnacées, Peyssoneliacées) des calcaires à petit Nummulites des chaînes subalpines septentrionales (massif des Bornes, Haute-Savoie, France). Arch. Sci. Genève 27, 111-132.

Sikic, K., and Sikic, L. (2007). Kotari (Samoborsko Gorje) – Palaeocene. Stop 10, in Post-Symposium Field Trip. eds. T. Grgasovic, and I. Vlahoivc, 9th International Symposium on Fossil Algae, Zagreb, Croat. Geol. Survey, 197-200.

Simone, L., Carannante, G., Bassi, D., and Cherchi, A. (2012). Rudist-bearing rhodalgal facies in the post-Turonian recovery of peri-Tethyan carbonate systems: a case history from the Nurra region (northwestern Sardinia, Italy). Geodiversitas 34, 167-187.

Sola, F., Braga, J.C., and Aguirre, J. (2013). Hooked coralline algae indicative of seagrass sediments associated to Mediterranean Messinian reefs (Poniente Basin, Almería, SE Spain). Palaeogeog., Palaeoclimatol., Palaeoecol. 374, 218-229.

Souaya, F.J. (1963). On the calcareous algae (Melobesioideae) of Gebel Gharra (Cairo-Suez road) with a local zonation and some possible correlations. J. Paleontol., 37, 1204-1216.

Stockar, R. (1997). Contributo alla conscenza dell’Eocene nel Canton Ticino: l’associazione ad alghe calcaree fossili di Prella (Mendrisiotto). Boll. Soc. ticinense Sci. Nat. 85, 23-46.

Stockar, R. (2000). Fossil coralline algae from the Paleocene Monferrato Member type-section (Tabiago Formation, northern Italy). Eclo. geo. Helv. 93, 409-427.

Stockar, R. (2001). Polystrata alba (Pfender) Denizot and Peyssonnelia antiqua Johnson: two peyssonnelilacean algae (Rhodophyta) from the Paleocene of the Tabiago Formation (Montorfano Member type-section, Como, Northern Italy). Geol. Insubr. 6, 15-22.

Studencki, W. (1988). Red algae from the Pinczów limestones (Middle Miocene, Swietokrzyskie Mountains, Poland). Acta Paleontol. Polon. 33, 3-57.

Taberner, C., and Bosence, D.W.J. (1985). Ecological succession from corals to coralline algae in Eocene Patch reefs, northern Spain, in Paleoalgology: Contemporary Research and Applications, eds. D.F. Toomey, and M.H. Nitecki. Springer Verlag, Berlin, 226-236.

Tomás, S., Aguirre, J., Braga, J.C. and Martín-Closas, C. (2007). Late Hauterivian coralline algae (Rhodophyta, Corallinales) from the Iberian Chain (E Spain). Taxonomy and the evolution of multisporangial reproductive structures. Facies 53, 79-95.

Umbgrove, J.H.F. 1926. Die Korallenfauna der Maastrichter Tuffkreide. Centralblatt Mineral., Geol. Paläontol. abt. B: Geol. Paläontol. 11, 414-416.

Vannucci, G. (1970). Microfacies a nullipore in un ciottolo calcareo della Morena del Garda. Atti Istit. Geol. Univ. Genova 7, 427-482.

Vannucci, G. (1980). Prime indagini sulle rhodoliti del «Serravaliano» della Valle Scrivia. Quaderni Istit. Geol. Univ. Geneova 1, 59-64.

Vannucci, G., Piazza, M., Fravega, P., and Arnera, V. (1993). Le rodoliti del mioceno inferiore del settore SW del Bacino Terziario del Piemonte (Spigno Monferrto - Alessandria). Atti Soc. Tosc. Sc. Nat. Mem., Ser. A 93-117.

Vannucci, G., Stockar, R., Piazza, M., and Fravega, P. (1993). La trasgressione tardo-oligocenica nella zona di Millesimo (Savona): caratteristiche e significato della associazioni faunistiche ed algali. Boll. Mus. reg. Sci. nat. Torino 11, 239-266.

Vannucci, G., Piazza, M., Fravega, P., and Chiesa, I. (1994). Calcareous Rhodophyceae from the «Astian facies» (Pliocene), Valle San Bartolomeo, Alessandria, NW Italy, in Studies on Ecology and Palaeoecology of Benthic Communities, eds. R. Matteuci, M.G., Carboni, and J.S. Pignatti. Boll. Soc. Paleontolo. It. Spec. Vol. 2, 351-364.

Vannucci, G., Piazza, M., Fravega, P., and Abate, C. (1996). Litostratigrafia e paleoecologia di successioni a rodoliti della "Pietra da Cantoni" (Monferrato orientale, Italia nord-occidentale). Atti Soc. Tosc. Sc. Nat. Mem. ser. A 103, 69-86.

Vannucci, G., Piazza, M., Pastorino, P., and Fravega, P. (1997). Las facies a coralli colniali e rodoficee calcaree di alcune sezioni basali della Formazione di Molare (Oligocene del bacino Terziario del Piemonte, Itlia nord-occidentale). Atti Soc. Toscana Sci. Nat. 104, 13-39.

Vannucci, G., Piazza, M., Fravega, P., and Basso, D. (2000). Revision and re-documentation of M. Airoldi’s species of *Archaeolithothamnium* from the Tertiary Piedmont Basin (NW Italy). Riv. It. Paleontol. Stratigr. 106, 191-202.

Vannucci, G., Quaranta, F., Piazza, M., and Fravega, P. (2003). The Oligocene reefal facies of Bric San Bernardino (Millesimo, NW Italy). Atti Soc. Ticinensi Sci. Terra 44, 35-44.

Vannucci, G., Piazza, M., Fravega, P., and Consigliere, C. (2006). New data and comparisons on red calcareous algae and larger foraminifera assemblages from Gàssino Formation (Eocene, Monferrato abd Torino, NW Italy). Atti Soc. It. Sci. nat. Mus. civ. Stor. nat. Milano 147, 183-200.

Woelkerling, W.J., Granier, B., and Dias-Brito, D. (2014). *Heydrichia* (?) *poignantii*, sp. Nov. (Sporolithaceae, Sporolithales, Rhodophyta), a 100 million year old fossil coralline alga from north-eastern Brazil, and a new Hauterivian record of *Sporolithon* from Switzerland. Carnéts Geol. 14, 139-158.
